# Supplementary material for: IL-33 amplifies an innate immune response in the degenerating retina
Source: PubMed Central journal article supplement — J Exp Med. 2016 Feb 8;213(2):189–207. doi: 10.1084/jem.20150894 (PMC4749925; doi:10.1084/jem.20150894), 2016-02-08
Supplement: supp_jem.20150894_JEM_20150894_sm.pdf [file supp_jem.20150894_JEM_20150894_sm.pdf]

SUPPLEMENTAL MATERIAL

Xi et al., <http://www.jem.org/cgi/content/full/jem.20150894/DC1>

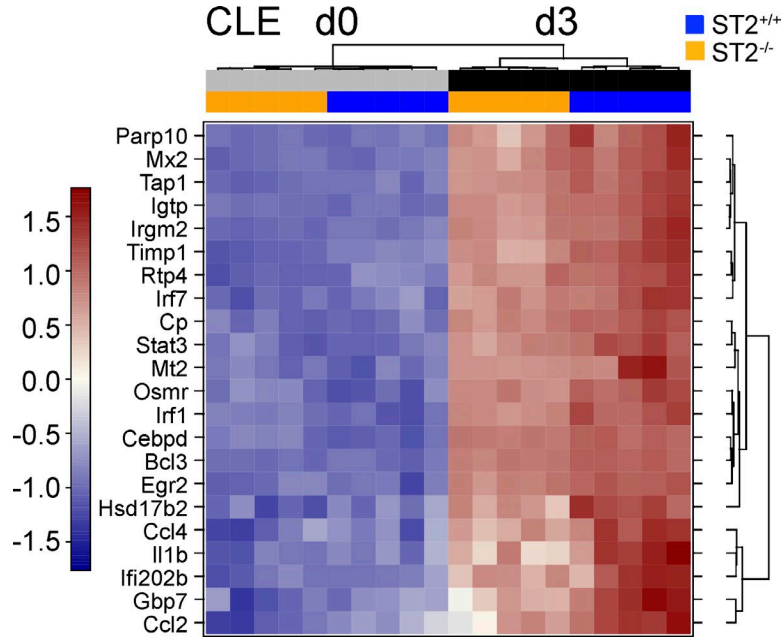

Figure S1. **Microarray analysis of light-injured retina from ST2<sup>+/+</sup> and ST2<sup>-/-</sup> mice.** ST2<sup>+/+</sup> and ST2<sup>-/-</sup> mice were exposed to bright light for 3 d. Gene expression in the retina before and after CLE was analyzed by microarray. *n* = 5/group. Heat map of the top 22 light exposure-inducible genes that are decreased in ST2<sup>-/-</sup> mice compared with ST2<sup>+/+</sup> mice.

Table S1. Top 22 light exposure-inducible genes that are decreased in ST2<sup>-/-</sup> mice compared to ST2<sup>+/+</sup> mice

| Gene symbol    | Log <sub>2</sub> fold change | P-value  |
|----------------|------------------------------|----------|
| <i>Parp10</i>  | -0.4070                      | 0.031338 |
| <i>Mx2</i>     | -0.5531                      | 0.023956 |
| <i>Tap1</i>    | -0.3652                      | 0.008909 |
| <i>Igtp</i>    | -0.4489                      | 0.011741 |
| <i>Irgm2</i>   | -0.4251                      | 0.028030 |
| <i>Timp1</i>   | -0.4043                      | 0.004441 |
| <i>Rtp4</i>    | -0.6969                      | 0.016280 |
| <i>Irf7</i>    | -0.3266                      | 0.031338 |
| <i>Cp</i>      | -0.4225                      | 0.007205 |
| <i>Stat3</i>   | -0.3860                      | 0.006960 |
| <i>Mt2</i>     | -0.4169                      | 0.047613 |
| <i>Osmr</i>    | -0.3798                      | 0.006583 |
| <i>Irf1</i>    | -0.3453                      | 0.004749 |
| <i>Cebpd</i>   | -0.3662                      | 0.004441 |
| <i>Bcl3</i>    | -0.4159                      | 0.002762 |
| <i>Egr2</i>    | -0.4352                      | 0.004441 |
| <i>Hsd17b2</i> | -0.4163                      | 0.004441 |
| <i>Ccl4</i>    | -0.4988                      | 0.007205 |
| <i>Il1b</i>    | -0.4339                      | 0.010421 |
| <i>Ifi202b</i> | -0.6794                      | 0.044264 |
| <i>Gbp7</i>    | -0.5574                      | 0.004441 |
| <i>Ccl2</i>    | -0.3398                      | 0.013638 |

Table S2. Gene ontology (GO) analysis of genes with decreased expression in ST2<sup>-/-</sup> mice compared to ST2<sup>+/+</sup> mice

| GO ID      | Biological function                        | P-value  | Genes down-regulated                                                                                            |
|------------|--------------------------------------------|----------|-----------------------------------------------------------------------------------------------------------------|
| GO:0006886 | Intracellular protein transport            | 0.001504 | <i>Bcl3, Egr2, Il1b, Stat3, Tap1, Rtp4, Parp10</i>                                                              |
| GO:0071345 | Cellular response to cytokine stimulus     | 0.001569 | <i>Igtp, Il1b, Irf1, Osmr, Ccl2, Stat3, Ifi202b, Irf7, Gbp7</i>                                                 |
| GO:0034124 | MyD88-dependent TLR signaling pathway      | 0.002303 | <i>Irf1, Irf7</i>                                                                                               |
| GO:0060416 | Response to growth hormone                 | 0.002303 | <i>Irf1, Stat3</i>                                                                                              |
| GO:0045944 | Transcription from RNA Pol II promoter     | 0.004203 | <i>Bcl3, Cebpd, Egr2, Il1b, Irf1, Stat3, Irf7</i>                                                               |
| GO:0006913 | Nucleocytoplasmic transport                | 0.005380 | <i>Bcl3, Egr2, Il1b, Stat3, Parp10</i>                                                                          |
| GO:0032870 | Cellular response to hormone stimulus      | 0.005669 | <i>Egr2, Il1b, Irf1, Stat3</i>                                                                                  |
| GO:0042089 | Cytokine biosynthetic process              | 0.005669 | <i>Bcl3, Il1b, Irf1, Irf7</i>                                                                                   |
| GO:0070727 | Cellular macromolecule localization        | 0.006119 | <i>Bcl3, Egr2, Il1b, Stat3, Tap1, Rtp4, Parp10</i>                                                              |
| GO:0042221 | Response to chemical                       | 0.006125 | <i>Cp, Egr2, Hsd17b2, Igtp, Il1b, Irf1, Mt2, Mx2, Osmr, Ccl2, Ccl4, Stat3, Ifi202b, Irf7, Irgm2, Rtp4, Gbp7</i> |
| GO:0031330 | Negative regulation of cellular catabolism | 0.006697 | <i>Stat3, Timp1</i>                                                                                             |
| GO:0045064 | Th2 cell differentiation                   | 0.006697 | <i>Bcl3, Irf1</i>                                                                                               |
| GO:0046688 | Response to copper ion                     | 0.006697 | <i>Cp, Mt2</i>                                                                                                  |
| GO:1901652 | Response to peptide                        | 0.007156 | <i>Egr2, Il1b, Irf1, Stat3</i>                                                                                  |
| GO:0042832 | Defense response to protozoan              | 0.007270 | <i>Bcl3, Irgm2, Gbp7</i>                                                                                        |
| GO:0010557 | Regulation of Macromolecule biosynthesis   | 0.007896 | <i>Bcl3, Cebpd, Egr2, Il1b, Irf1, Ccl2, Stat3, Irf7</i>                                                         |
| GO:0034341 | Response to interferon-gamma               | 0.008882 | <i>Irf1, Ccl2, Irgm2, Gbp7</i>                                                                                  |

Top 17 GO terms enriched are shown.
